# Supplementary material
Source: MDPI journal article supplement (https://www.mdpi.com/2227-9709/11/2/28)
Supplement: s1 [file s1]

Table S1. Concept codes from four International Classification of Diseases Terminologies

| ICD Terminology                                                                                           | Code     |
|-----------------------------------------------------------------------------------------------------------|----------|
| ICD-9                                                                                                     |          |
| Macular degeneration (senile), unspecified                                                                | 36250    |
| Nonexudative senile macular degeneration                                                                  | 36251    |
| Exudative senile macular degeneration                                                                     | 36252    |
| ICD-10                                                                                                    |          |
| Degeneration of macula and posterior pole                                                                 | H35.3    |
| Senile macular degeneration (atrophic) (exudative)                                                        |          |
| ICD-9-CM                                                                                                  |          |
| Degeneration of macula and posterior pole                                                                 | 362.5    |
| Macular degeneration (senile), unspecified                                                                | 362.50   |
| Nonexudative senile macular degeneration                                                                  | 362.51   |
| Exudative senile macular degeneration                                                                     | 362.52   |
| ICD-10-CM                                                                                                 |          |
| Unspecified macular degeneration                                                                          | H35.30   |
| Nonexudative age-related macular degeneration                                                             | H35.31   |
| Nonexudative age-related macular degeneration, right eye                                                  | H35.311  |
| Nonexudative age-related macular degeneration, right eye, stage unspecified                               | H35.3110 |
| Nonexudative age-related macular degeneration, right eye, early dry stage                                 | H35.3111 |
| Nonexudative age-related macular degeneration, right eye, intermediate dry stage                          | H35.3112 |
| Nonexudative age-related macular degeneration, right eye, advanced atrophic without subfoveal involvement | H35.3113 |
| Nonexudative age-related macular degeneration, right eye, advanced atrophic with subfoveal involvement    | H35.3114 |
| Nonexudative age-related macular degeneration, left eye                                                   | H35.312  |
| Nonexudative age-related macular degeneration, left eye, stage unspecified                                | H35.3120 |
| Nonexudative age-related macular degeneration, left eye, early dry stage                                  | H35.3121 |
| Nonexudative age-related macular degeneration, left eye, intermediate dry stage                           | H35.3122 |
| Nonexudative age-related macular degeneration, left eye, advanced atrophic without subfoveal involvement  | H35.3123 |

|                                                                                                                 |          |
|-----------------------------------------------------------------------------------------------------------------|----------|
| Nonexudative age-related macular degeneration, left eye, advanced atrophic with subfoveal involvement           | H35.3124 |
| Nonexudative age-related macular degeneration, bilateral                                                        | H35.313  |
| Non-exudative age-related macular degeneration, bilateral, stage unspecified                                    | H35.3130 |
| Nonexudative age-related macular degeneration, bilateral, early dry stage                                       | H35.3131 |
| Nonexudative age-related macular degeneration, bilateral, intermediate dry stage                                | H35.3132 |
| Nonexudative age-related macular degeneration, bilateral, advanced atrophic without subfoveal involvement       | H35.3133 |
| Nonexudative age-related macular degeneration, bilateral, advanced atrophic with subfoveal involvement          | H35.3134 |
| Nonexudative age-related macular degeneration, unspecified eye                                                  | H35.319  |
| Non-exudative age-related macular degeneration, unspecified eye, stage unspecified                              | H35.3190 |
| Nonexudative age-related macular degeneration, unspecified eye, early dry stage                                 | H35.3191 |
| Nonexudative age-related macular degeneration, unspecified eye, intermediate dry stage                          | H35.3192 |
| Nonexudative age-related macular degeneration, unspecified eye, advanced atrophic without subfoveal involvement | H35.3193 |
| Nonexudative age-related macular degeneration, unspecified eye, advanced atrophic with subfoveal involvement    | H35.3194 |
| Exudative age-related macular degeneration                                                                      | H35.32   |
| Exudative age-related macular degeneration, right eye                                                           | H35.321  |
| Exudative age-related macular degeneration, right eye, stage unspecified                                        | H35.3210 |
| Exudative age-related macular degeneration, right eye, with active choroidal neovascularization                 | H35.3211 |
| Exudative age-related macular degeneration, right eye, with inactive choroidal neovascularization               | H35.3212 |
| Exudative age-related macular degeneration, right eye, with inactive scar                                       | H35.3213 |
| Exudative age-related macular degeneration, left eye                                                            | H35.322  |
| Exudative age-related macular degeneration, left eye, stage unspecified                                         | H35.3220 |
| Exudative age-related macular degeneration, left eye, with active choroidal neovascularization                  | H35.3221 |
| Exudative age-related macular degeneration, left eye, with inactive choroidal neovascularization                | H35.3222 |
| Exudative age-related macular degeneration, left eye, with inactive scar                                        | H35.3223 |
| Exudative age-related macular degeneration, bilateral                                                           | H35.323  |
| Exudative age-related macular degeneration, bilateral, stage unspecified                                        | H35.3230 |
| Exudative age-related macular degeneration, bilateral, with active choroidal neovascularization                 | H35.3231 |
| Exudative age-related macular degeneration, bilateral, with inactive choroidal neovascularization               | H35.3232 |

|                                                                                                         |          |
|---------------------------------------------------------------------------------------------------------|----------|
| Exudative age-related macular degeneration, bilateral, with inactive scar                               | H35.3233 |
| Exudative age-related macular degeneration, unspecified eye                                             | H35.329  |
| Exudative age-related macular degeneration, unspecified eye, stage unspecified                          | H35.3290 |
| Exudative age-related macular degeneration, unspecified eye, with active choroidal neovascularization   | H35.3291 |
| Exudative age-related macular degeneration, unspecified eye, with inactive choroidal neovascularization | H35.3292 |
| Exudative age-related macular degeneration, unspecified eye, with inactive scar                         | H35.3293 |

ICD – International Classification of Diseases, CM – Clinical Modifications
